# Supplementary material for: Anti-inflammatory and Anti-oxidant Activity of Hidrox® in Rotenone-Induced Parkinson’s Disease in Mice
Source: MDPI journal article supplement (doi:10.3390/antiox9090824), 2020-09-03
Supplement: s2 [file s2]

# Anti-Inflammatory and Anti-Oxidant Activity of Hidrox<sup>®</sup> in Rotenone-Induced Parkinson's Disease in Mice

Rosalba Siracusa <sup>1,†</sup>, Maria Scuto <sup>2,†</sup>, Roberta Fusco <sup>1</sup>, Angela Trovato <sup>2,\*</sup>, Maria Laura Ontario <sup>2</sup>, Roberto Crea <sup>3</sup>, Rosanna Di Paola <sup>1,\*</sup>, Salvatore Cuzzocrea <sup>1,4,‡</sup> and Vittorio Calabrese <sup>2,‡</sup>

<sup>1</sup> Department of Chemical, Biological, Pharmaceutical and Environmental Sciences, University of Messina, Viale Ferdinando Stagno D'Alcontres, 31, 98166 Messina, Italy; rfusco@unime.it

<sup>2</sup> Department of Biomedical and Biotechnological Sciences, University of Catania, Via S. Sofia, 89, 95123 Catania, Italy; ti.lrsoriatno@oiratno.arualairam

<sup>3</sup> Oliphenol LLC., 26225 Eden Landing Road, Unit C, Hayward, CA, 94545, USA; ppontoniere@creagri.com

<sup>4</sup> Department of Pharmacological and Physiological Science, Saint Louis University School of Medicine, Saint Louis, 63104, USA

\* Correspondence: trovato@unict.it (A.T.); dipaolar@unime.it (R.D.P.); Tel.: +39-09-5478-1165 (A.T.); +39-09-0676-5208 (R.D.P.)

† Rosalba Siracusa and Maria Scuto are the co-first authors.

‡ Salvatore Cuzzocrea and Vittorio Calabrese shared senior authorship.

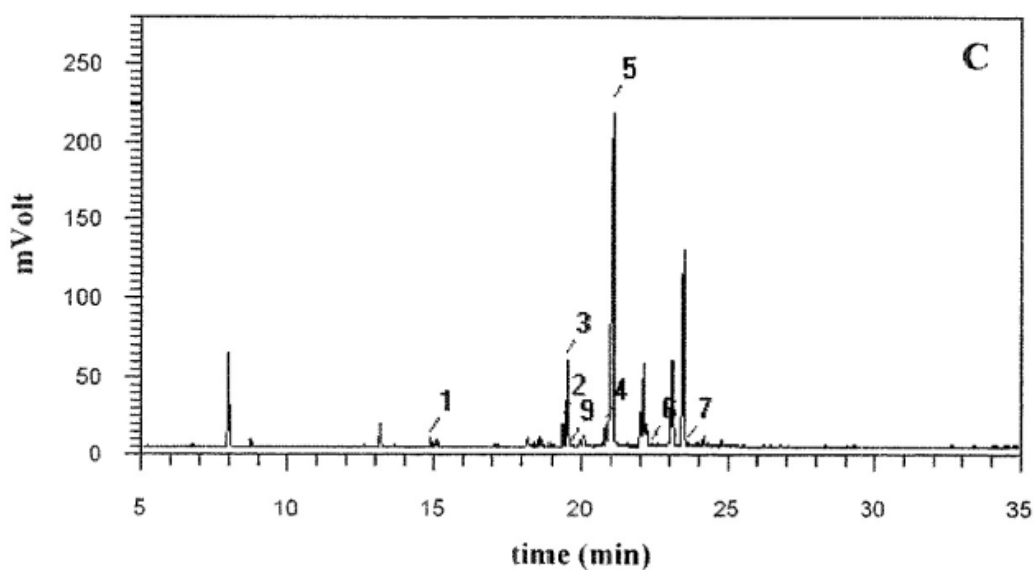

Figure S1. Gas chromatography mass spectrometry (GC-MS) analysis and phenolic compound identification, by spectrum matching and library searching in the NIST/EPS/NIH Mass Spectral Library Database, of HD. Peaks: 1, tyrosol; 2, vanilic acid; 3, hydroxytyrosol; 4, 3,4-dihydroxybenzoic acid; 5, citric acid (hydrolysis acid to obtain HD from OVW, olive aqueous vegetation water); 6, syringic acid; 7, gallic acid; 8, caffeic acid (trace); 9, 3-hydroxy,4-methoxyphenylacetic acid; 10, gentisic acid (trace)

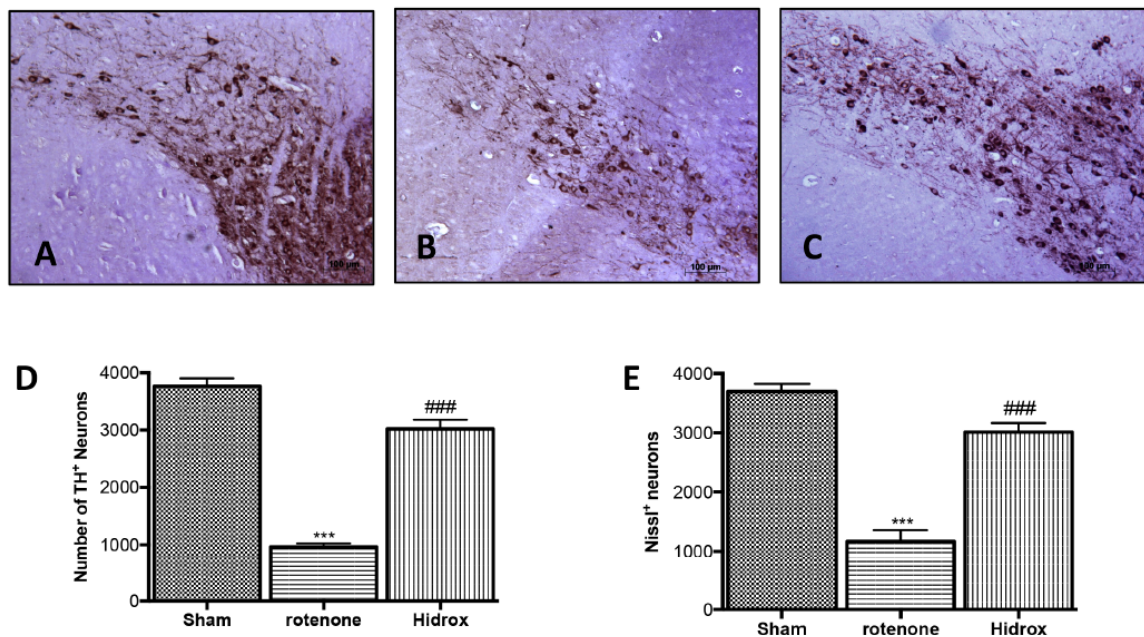

Figure S2. Stereological analysis in SN of rotenone-treated mice. Sham (A), rotenone-mice (B), and HD-treated mice (C), respectively, stained for stereological counting of TH-positive and cresyl violet positive neurons in sections of the SN from one hemisphere (D,E). Each data is expressed as a number of TH<sup>+</sup> and Nissl<sup>+</sup> neurons and are mean  $\pm$  SEM from 5 mice/group. \*\*\*  $p < 0.001$  vs. Sham; \*\*\*  $p < 0.001$  vs. rotenone (D,E). Scale bar 100  $\mu$ m.

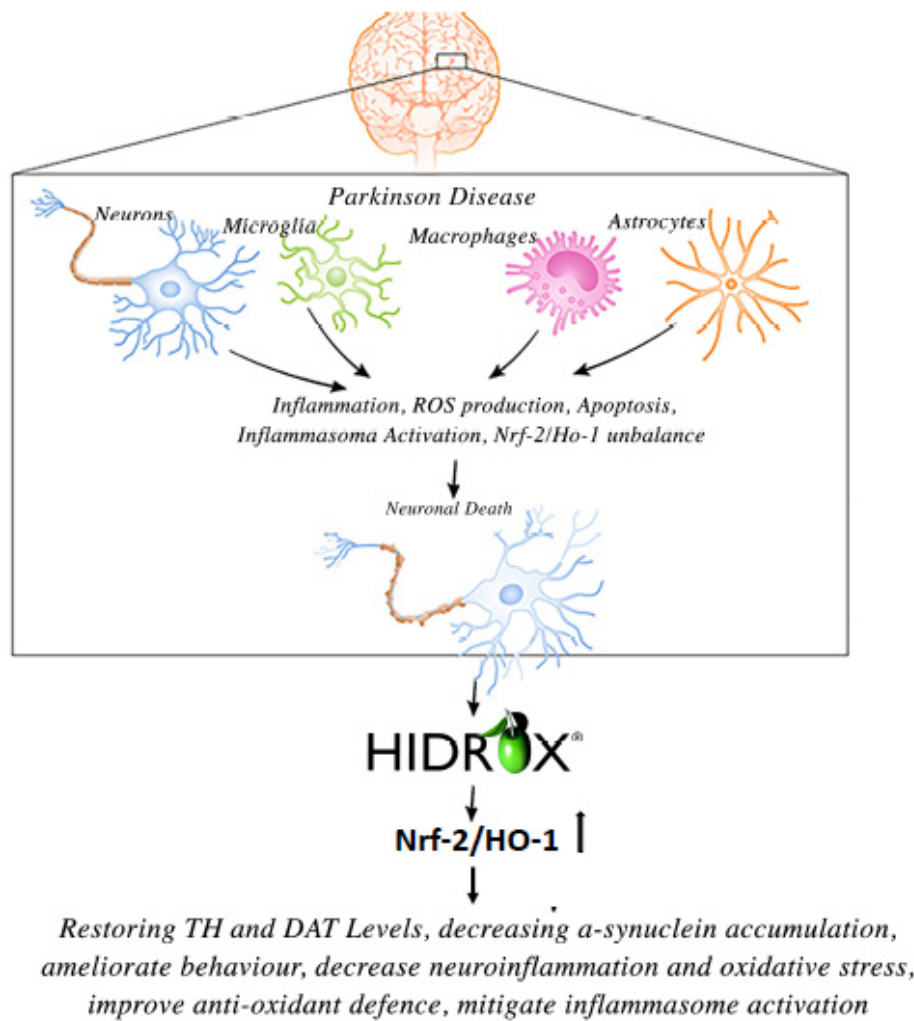

Figure S3. Processes implicated in the pathogenesis of Parkinson's and effects of Hidrox®.
